# Supplementary material
Source: publisher figshare collection journal article supplement (https://frontiersin.figshare.com/ndownloader/files/15448280)
Supplement: Supplementary file 1 [file 15448280]

Supplementary Material

Article Title

Co-digestion of wastewater-grown filamentous algae with sewage sludge improves biogas production and energy balance compared to thermal, chemical or thermochemical pretreatments

Pavlo Bohutskyi1*, Troy A. Keller2, Duc Phan3, Markeshia L. Parris2, Mengyuan Li2, Lakesha Richardson2, Anatoliy M. Kopachevsky4,5,6

1 Biological Sciences Division, Pacific Northwest National Laboratory, 3300 Stevens Dr., Richland, WA 99354, USA

2 Department of Earth and Space Sciences, Columbus State University, 4225 University Ave. Columbus, GA 31907, USA

3 Department of Civil and Environmental Engineering, The University of Texas at San Antonio, 1 UTSA Cir San Antonio, TX 78249, USA

4 Department of Water Supply and Sanitary Engineering, Academy of Construction and Architecture of V.I. Vernadsky Crimean Federal University, 4 Prospekt Vernadskogo, Simferopol, 295007, Republic of Crimea

5 Water Technologies Research and Production Company, 7 Petropavlovskaya Street, Simferopol, 295000, Republic of Crimea

6 Water of the Crimea State Unitary Enterprise of the Republic of Crimea, 1а Kievskaya Street, Simferopol, 295053, Republic of Crimea

*** Correspondence:**Pavlo Bohutskyi[pavlo.bohutskyi@pnnl.gov](mailto:pavlo.bohutskyi@pnnl.gov); bohutskyi@gmail.com

Keywords: filamentous algal treatment systems, indigenous algal polyculture, algal biomass pretreatment, algae co-digestion with sewage sludge, methane production models, scaled digester energy balance analysis


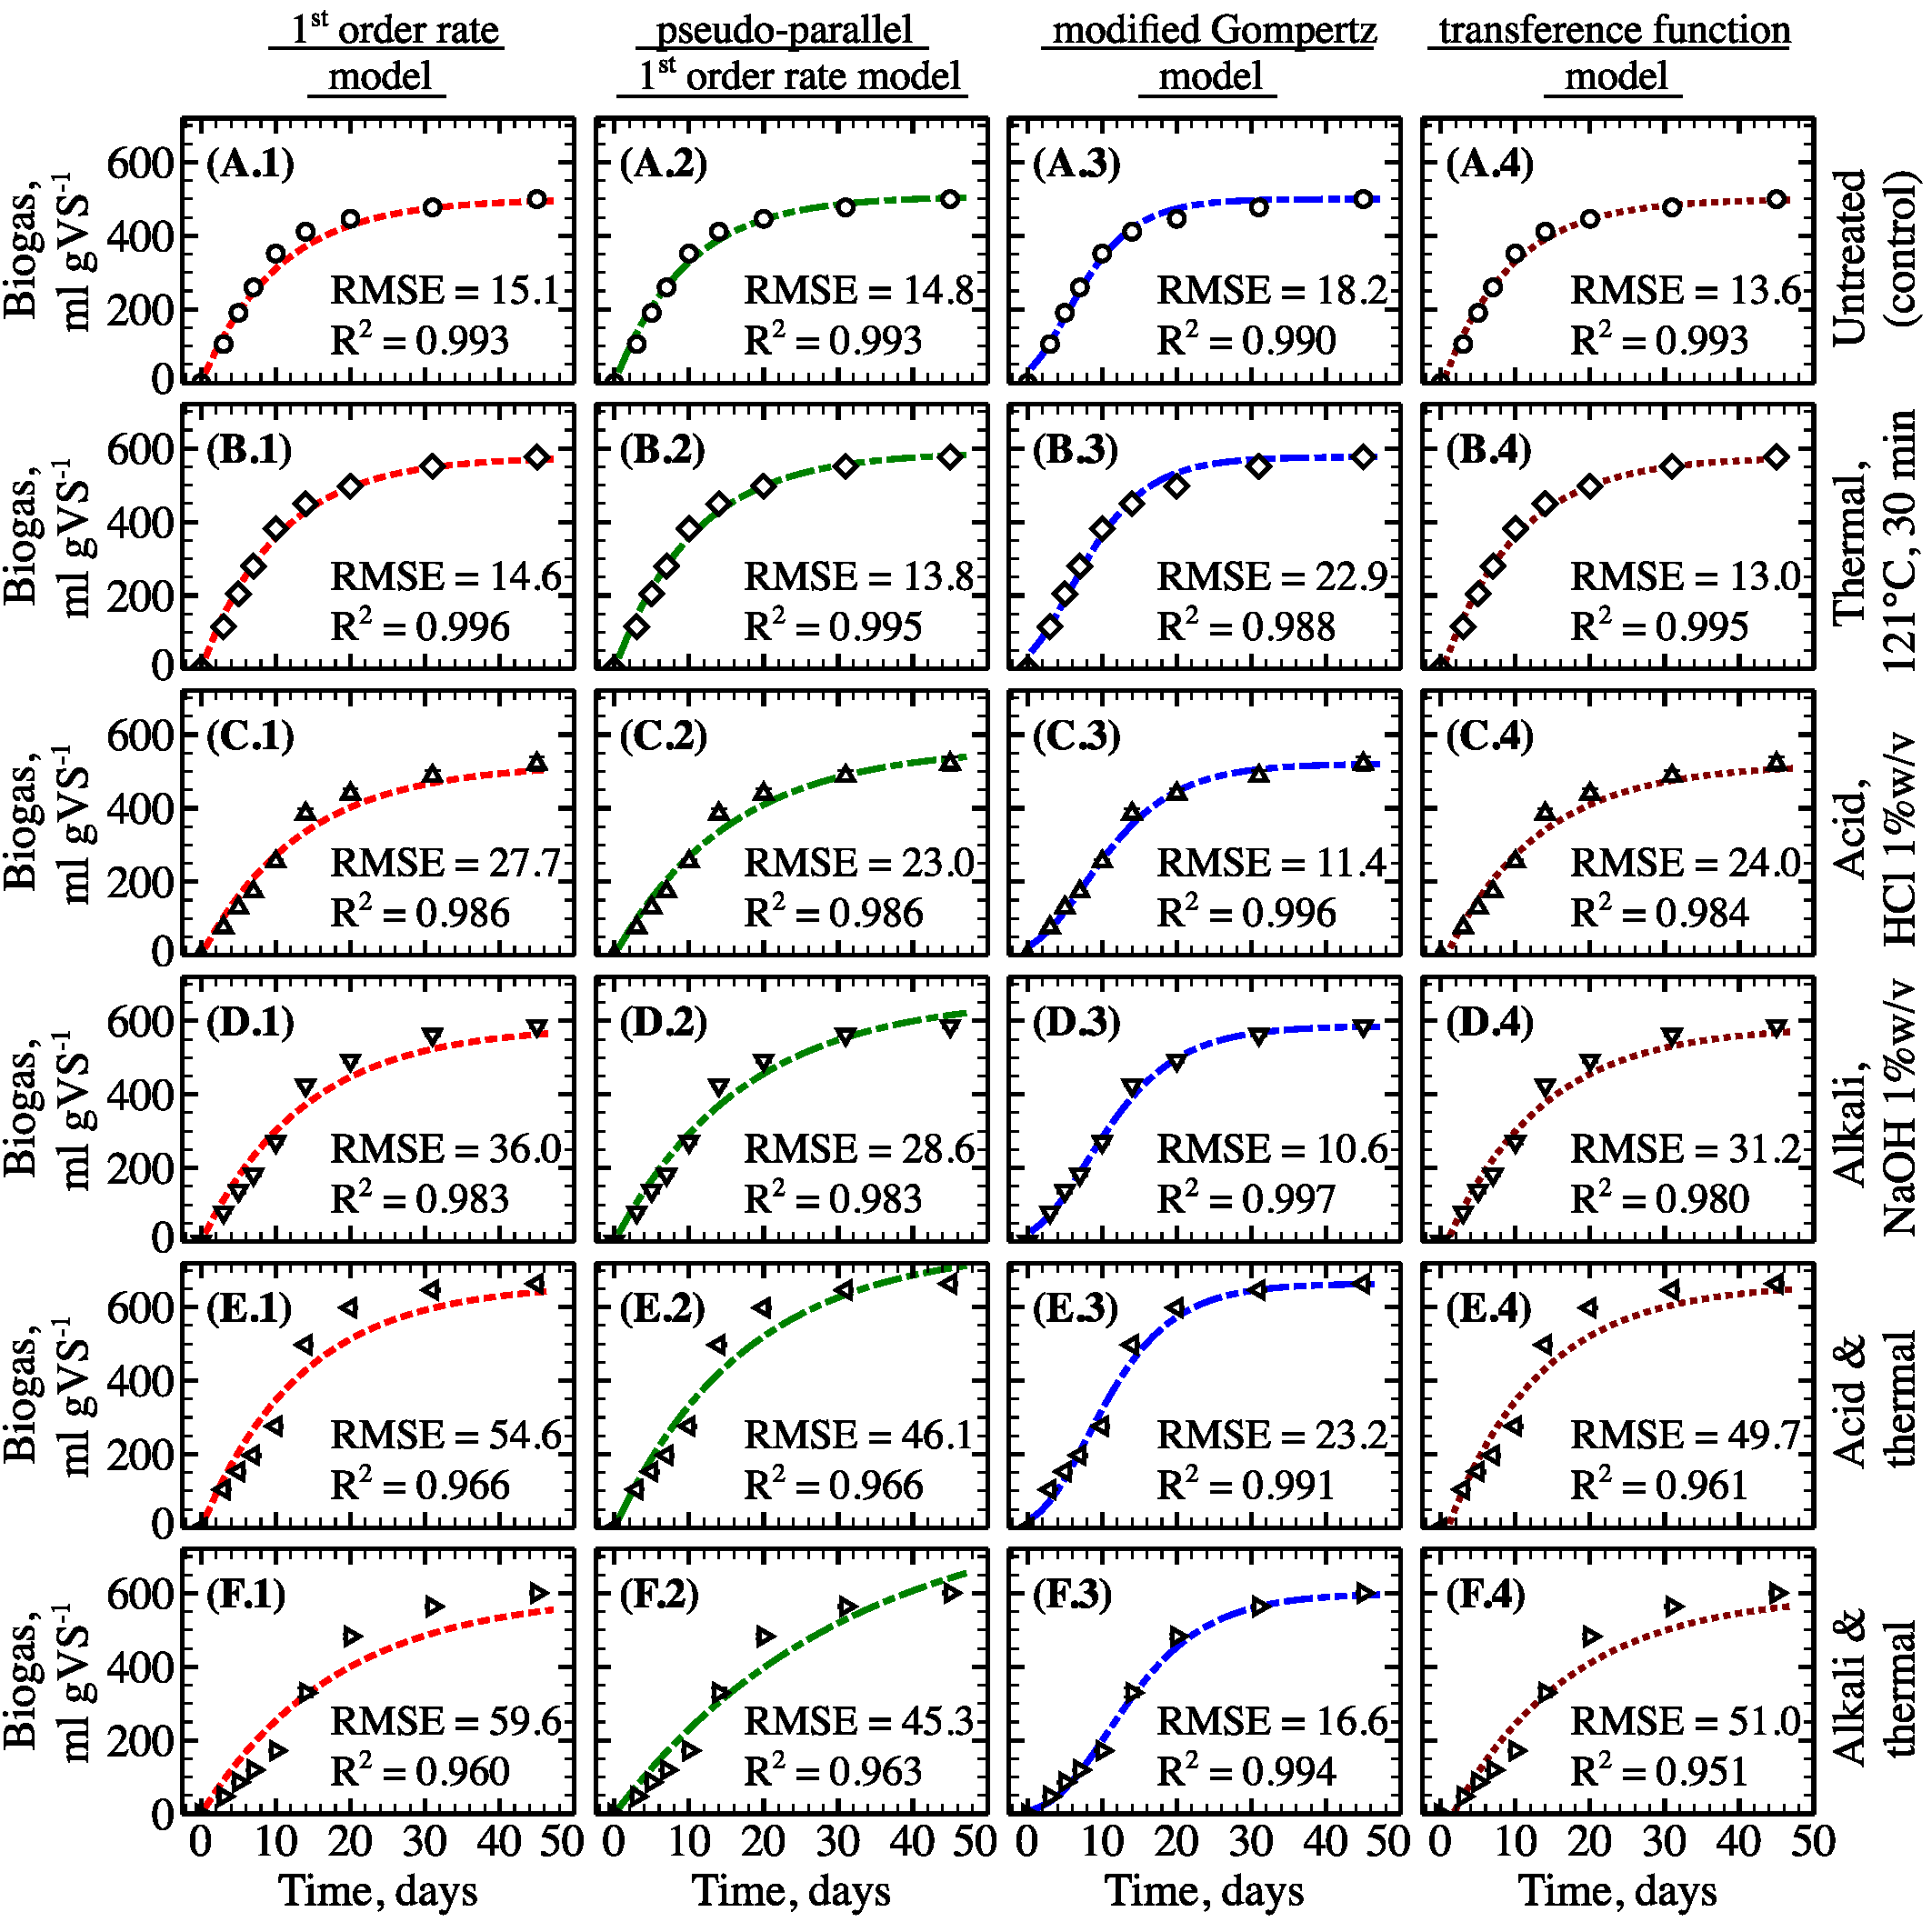


**Supplementary Figure S1.** Experimental and predicted specific biogas yield from untreated and pretreated filamentous algal biomass (points – experimental data; lines – model fit; pretreatment conditions are shown on the right; error bars represent the 1 S.D. for 3 replicates)
